# Supplementary material for: LDLR is an entry receptor for Crimean-Congo hemorrhagic fever virus
Source: Springer Nature journal article supplement (doi:10.1038/s41422-023-00917-w), 2024-01-05
Supplement: MOESM1 [file 41422_2023_917_MOESM1_ESM.pdf]

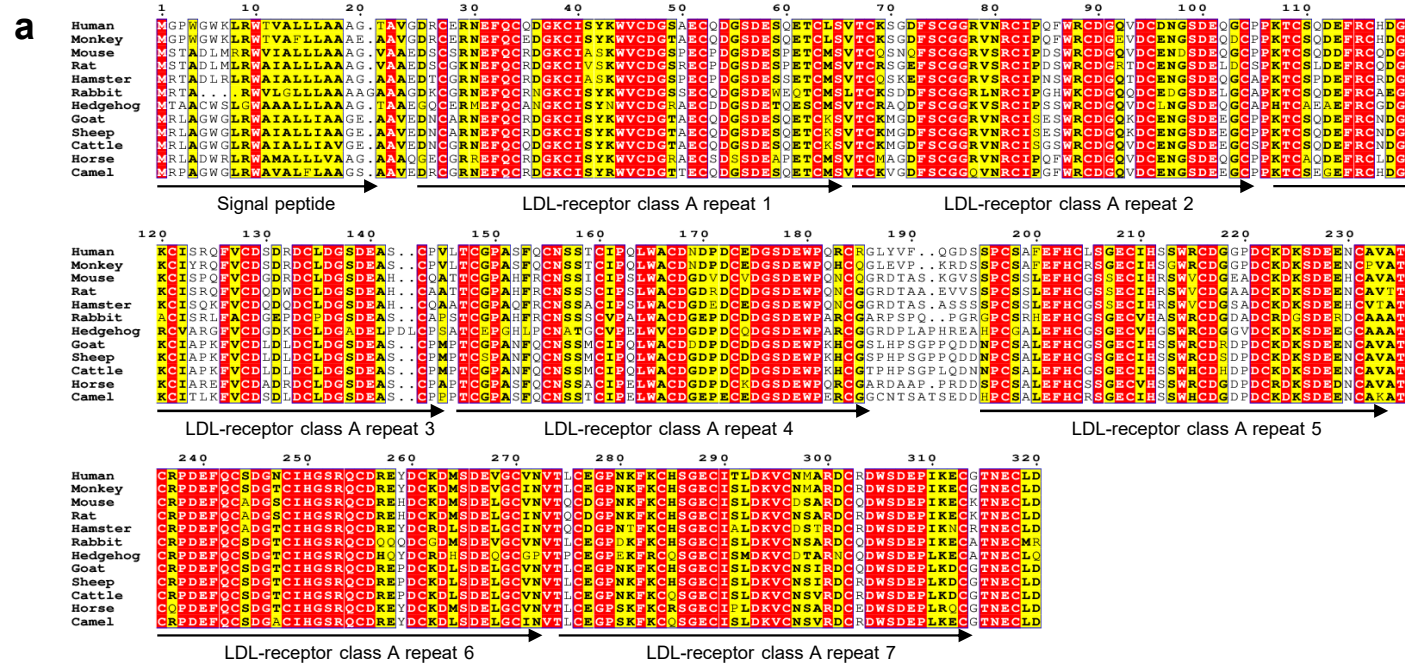

**b**

|          | Human | Monkey | Mouse | Rat  | Hamster | Rabbit | Hedgehog | Goat | Sheep | Cattle | Horse | Camel |
|----------|-------|--------|-------|------|---------|--------|----------|------|-------|--------|-------|-------|
| Human    |       | 93.4   | 77.3  | 76.3 | 74.8    | 72.6   | 68.2     | 80.8 | 80.8  | 80.5   | 80.1  | 81.7  |
| Monkey   | 96.3  |        | 75.1  | 75.7 | 73.8    | 70.7   | 67       | 81.4 | 81.1  | 80.5   | 79.1  | 81.7  |
| Mouse    | 84.4  | 82.9   |       | 89.4 | 86.3    | 71.4   | 66.7     | 74.5 | 74.2  | 74     | 74.8  | 72.7  |
| Rat      | 83.5  | 82.2   | 92.8  |      | 86      | 71.4   | 66       | 74.5 | 74.8  | 74.8   | 74.8  | 74.2  |
| Hamster  | 81.9  | 81.9   | 91.3  | 92.8 |         | 69.9   | 67       | 74.5 | 74.8  | 74.5   | 74.8  | 74.8  |
| Rabbit   | 82.2  | 80.9   | 81.6  | 82.6 | 81.3    |        | 66.7     | 71.8 | 71.5  | 71.2   | 72.4  | 70.3  |
| Hedgehog | 79.9  | 78.4   | 77.8  | 77.5 | 78.7    | 78.1   |          | 67.6 | 67.6  | 67.6   | 71    | 68.5  |
| Goat     | 88.5  | 88.2   | 83.5  | 82.6 | 82.3    | 82     | 77.5     |      | 98.4  | 95     | 80.1  | 83.5  |
| Sheep    | 87.6  | 87.3   | 83.5  | 82.6 | 82.3    | 82     | 77.8     | 98.8 |       | 95.7   | 80.1  | 83.9  |
| Cattle   | 87.3  | 87.6   | 83.9  | 83.5 | 83.2    | 82     | 77.8     | 96.9 | 97.2  |        | 79.2  | 84.8  |
| Horse    | 87.5  | 86.9   | 83.8  | 83.5 | 84.1    | 81.9   | 80.9     | 87.6 | 87.3  | 86.6   |       | 79.5  |
| Camel    | 88.8  | 87.6   | 83.2  | 83.5 | 83.5    | 82.3   | 78.1     | 90.7 | 90.7  | 91.6   | 87.9  |       |

Identity

Similarity

**Supplementary information, Fig. S1. Sequence alignment of LBD of LDLR across different species. a,** Sequence alignment of LBD of human LDLR (*Homo sapiens*, NP\_000518.1) to its orthologues from monkey (*Macaca mulatta*, XP\_014978386.2), mouse (*Mus musculus*, NP\_034830.2), rat (*Rattus norvegicus*, NP\_786938.2), hamster (*Mesocricetus auratus*, XP\_005078593.1), rabbit (*Oryctolagus cuniculus*, NP\_001265794.1), hedgehog (*Erinaceus europaeus*, XP\_060037767.1), goat (*Capra hircus*, XP\_005682432.1), sheep (*Ovis aries*, XP\_004008580.2), cattle (*Bos taurus*, NP\_001160002.1), horse (*Equus caballus*, XP\_005611994.2) and camel (*Camelus dromedarius*, XP\_010976615.1) using ESPrnt 3. Red and yellow boxes indicate conserved and similar residues between orthologues, respectively. The LDL-receptor class A repeats are indicated below the sequence. **b,** The identity (green) and similarity (yellow) matrix of LBD of LDLR across species. The matrix was generated using MatGat 2.01.
